# Supplementary material for: Exploring the anti-inflammatory activity of sulforaphane metabolites
Source: Springer Nature journal article supplement (doi:10.1007/s43440-026-00823-z), 2026-01-23
Supplement: MOESM1 [file 43440_2026_823_MOESM1_ESM.pdf]

## SUPPLEMENTARY MATERIALS

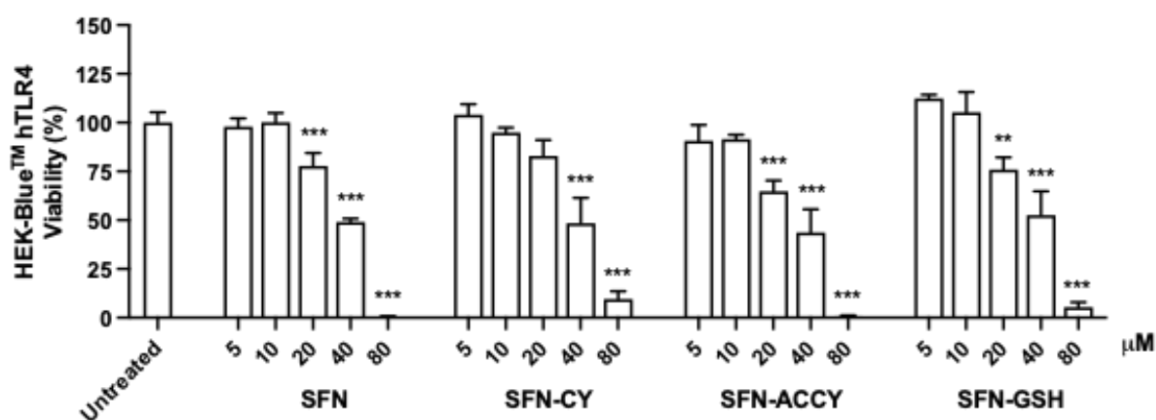

**Figure S1.** Effect of the tested compounds on HEK-Blue™ hTLR4 cell viability. Cells were cultured overnight in medium containing 10% serum, which was replaced with serum-free medium before treatments with sulforaphane and its metabolites for 24 h. At the end of incubation, cell viability was determined by MTT assay. Results are expressed as a percentage of cell viability relative to untreated cells. Data are means  $\pm$  SD of three independent experiments.

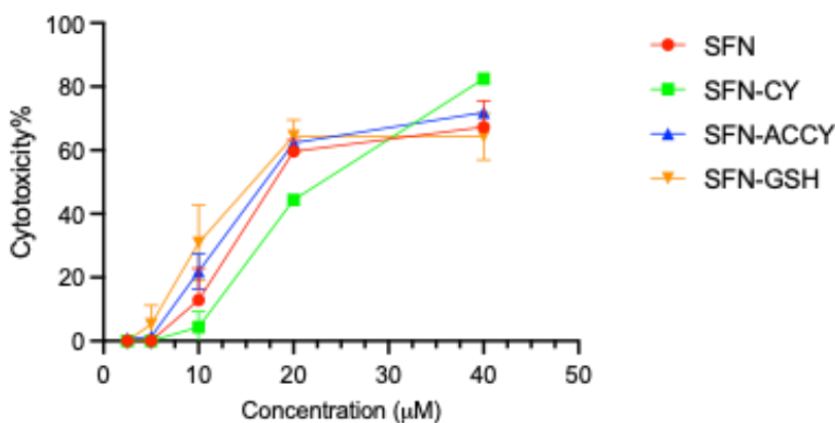

**Figure S2.** Cytotoxicity in THP-1 cells differentiated into macrophages with Phorbol 12-Myristate 13-Acetate (PMA) and treated for 24 h with sulforaphane and its metabolites (2.5 – 40 μM), evaluated by WST-1 assay. Data are reported as mean  $\pm$  SD of three independent experiments.

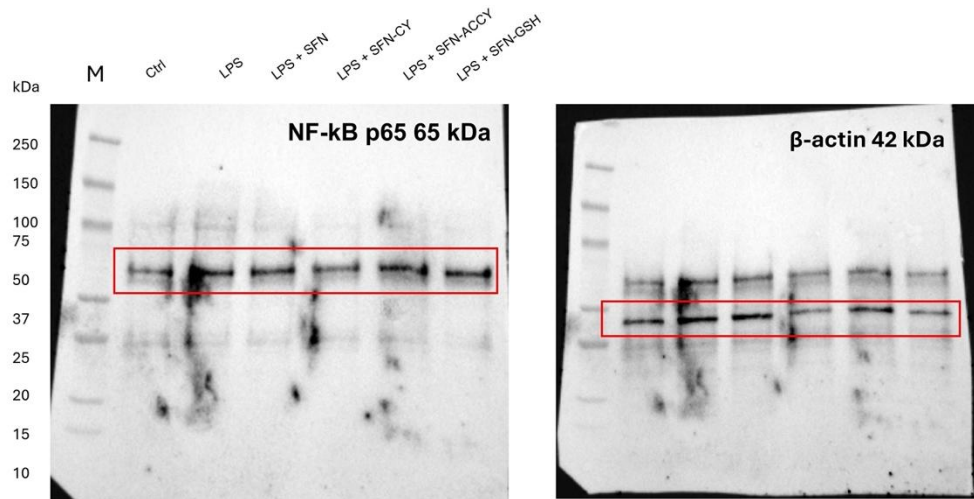

**Figure S3.** Evaluation of nuclear NF- $\kappa$ B p56 expression after 3 h of sulforaphane and metabolites treatment in lipopolysaccharide-stimulated THP-1 macrophages by western blotting.

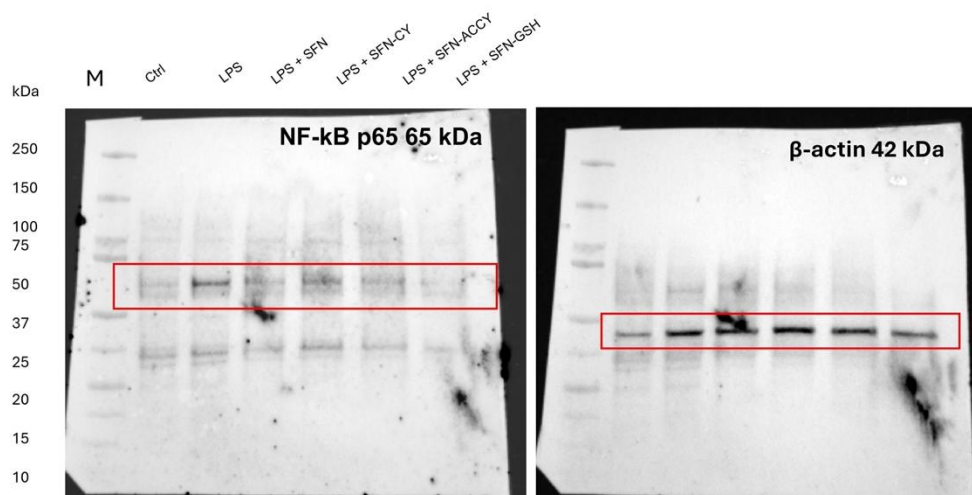

**Figure S4.** Evaluation of nuclear NF- $\kappa$ B p56 expression after 24 h of sulforaphane and metabolites treatment in lipopolysaccharide-stimulated THP-1 macrophages by western blotting.

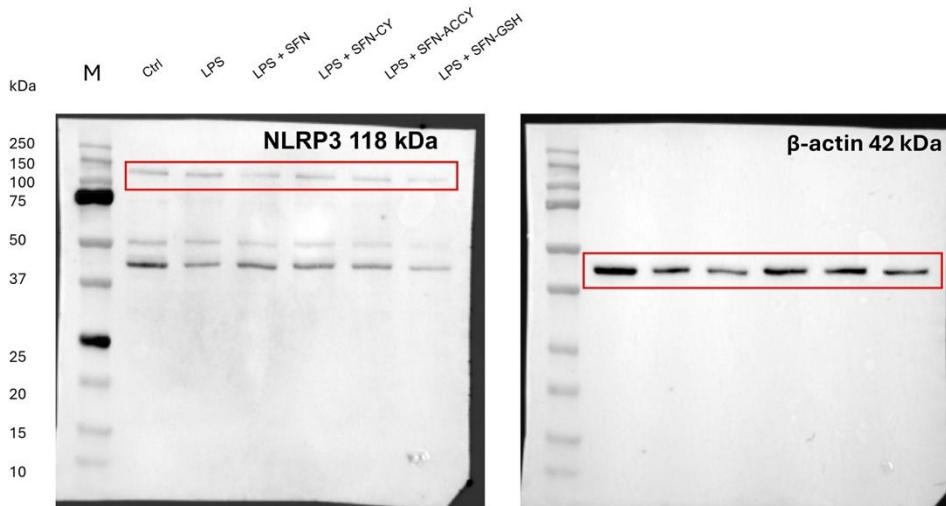

**Figure S5.** Evaluation of cytoplasmic NLRP3 expression after 24 hours of sulforaphane and metabolites treatment in lipopolysaccharide-stimulated THP-1 macrophages by western blotting.

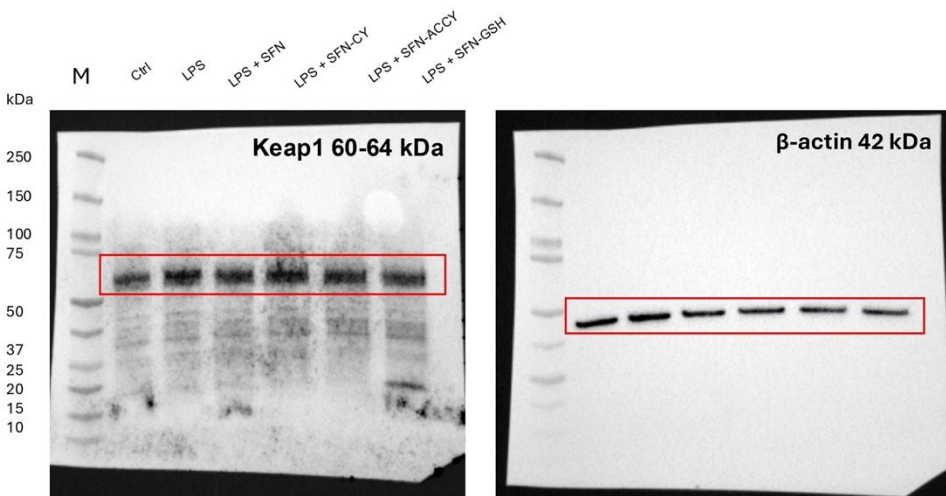

**Figure S6.** Evaluation of cytoplasmic Keap1 expression after 24 hours of sulforaphane and metabolites treatment in lipopolysaccharide-stimulated THP-1 macrophages by western blotting.

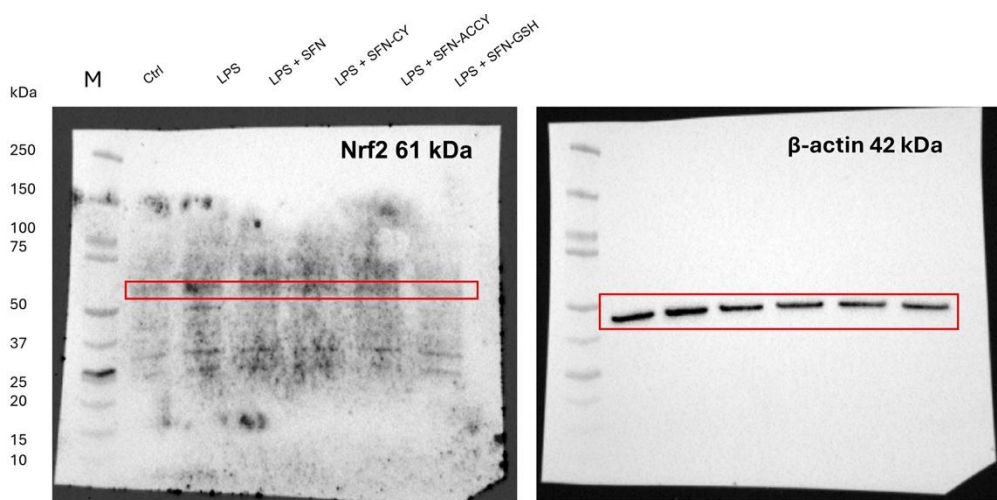

**Figure S7.** Evaluation of cytoplasmic Nrf2 expression after 24 hours of sulforaphane and metabolites treatment in lipopolysaccharide-stimulated THP-1 macrophages by western blotting.

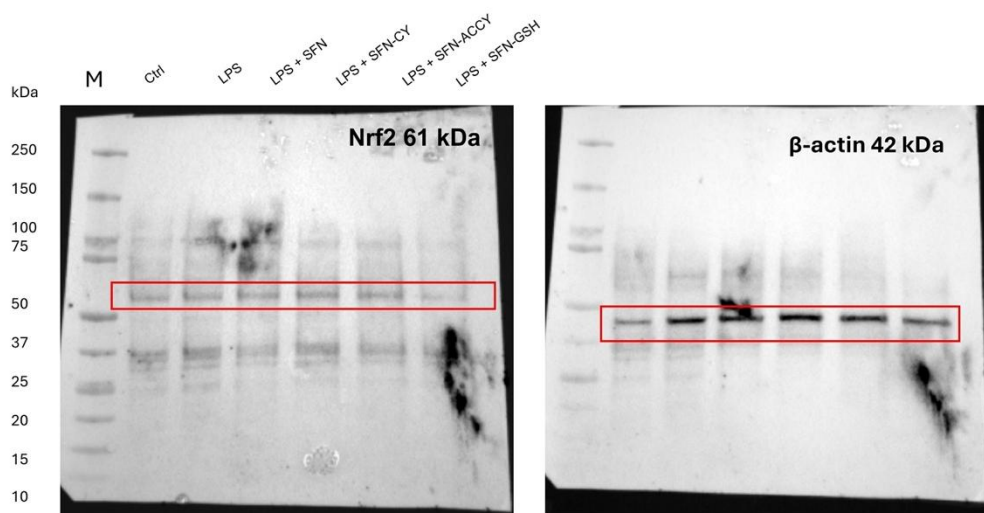

**Figure S8.** Evaluation of nuclear Nrf2 expression after 24 hours of sulforaphane and metabolites treatment in lipopolysaccharide-stimulated THP-1 macrophages by western blotting.
